# Supplementary material
Source: bioRxiv or medRxiv preprint supplement (https://www.biorxiv.org/highwire/filestream/135054/field_highwire_adjunct_files/0/449157-1.pdf)
Supplement: Supplementary file [file 449157-1.pdf]

## Supplementary Material

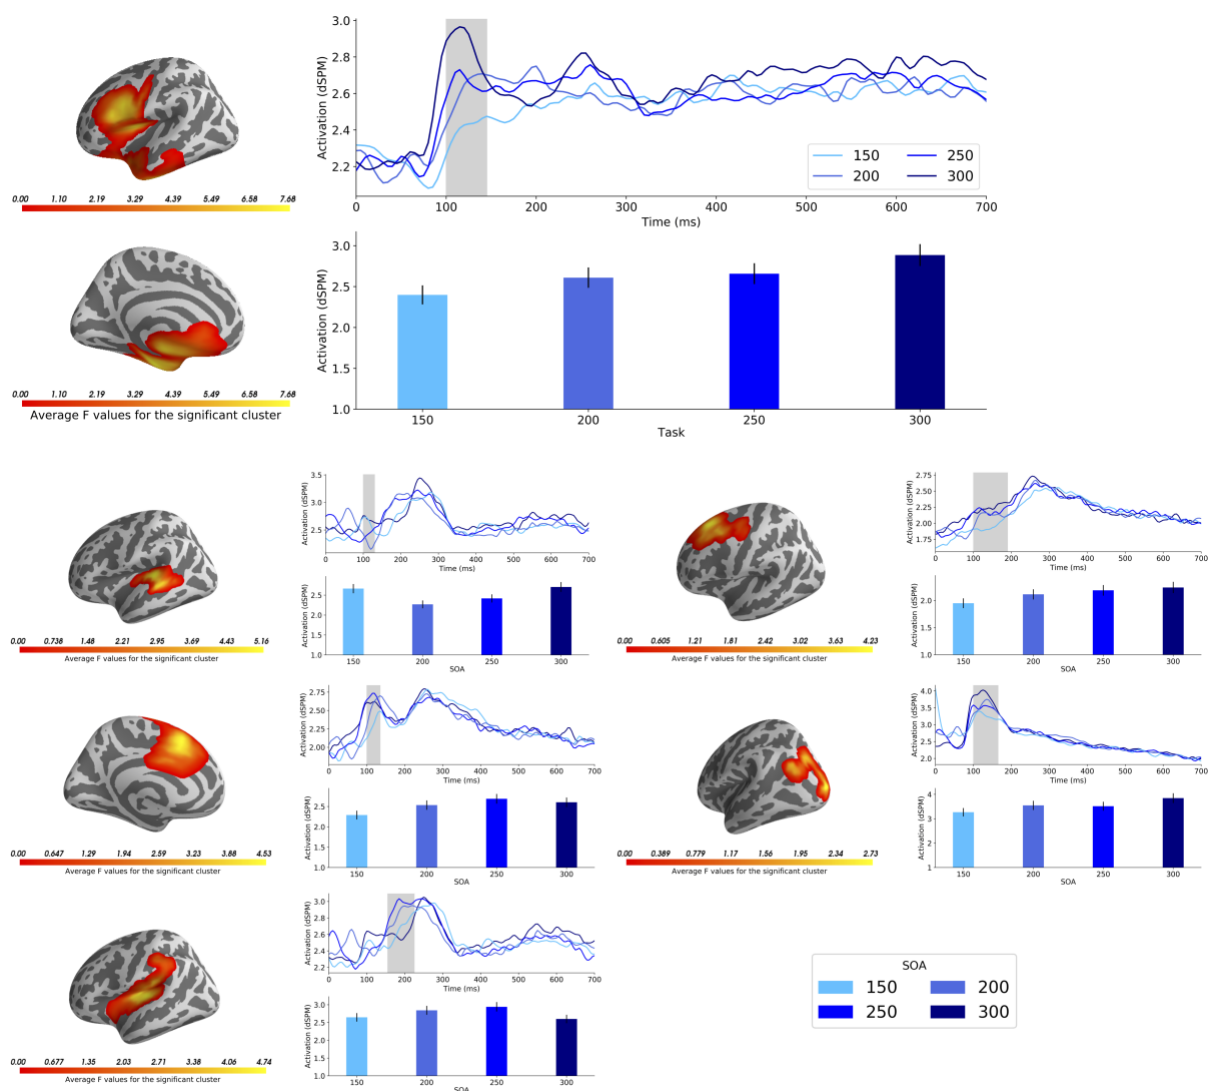

Omnibus analysis: Spatio-temporal clusters the main effect of SOA. The shaded regions indicate that the difference in activity between the conditions was significant at a  $p < 0.05$ .

## Object Naming

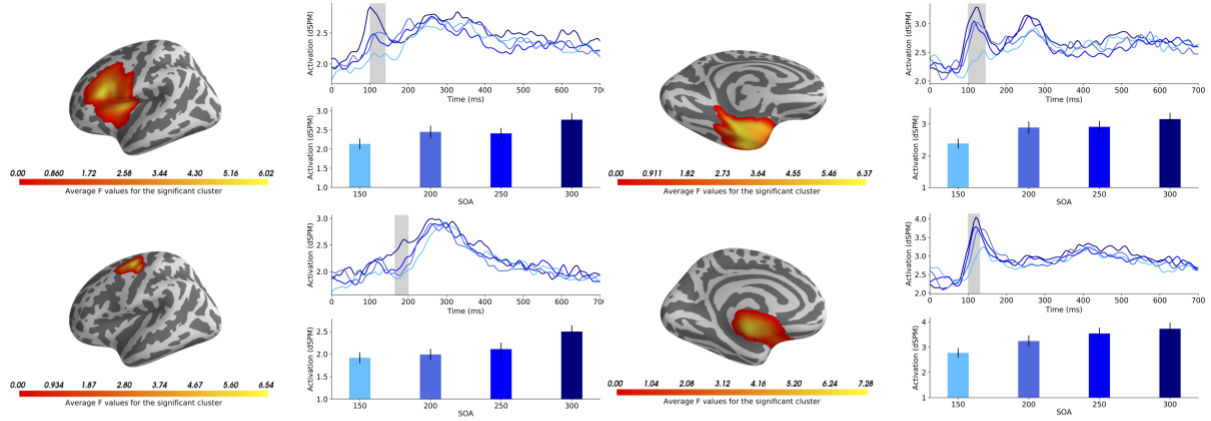

## Word Reading

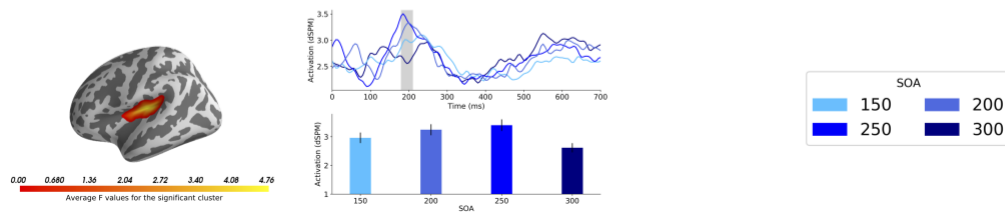

Analysis within task: Spatio-temporal clusters the main effect of SOA, within Task. The shaded regions indicate that the difference in activity between the conditions was significant at a  $p < 0.05$ .

## Object Naming

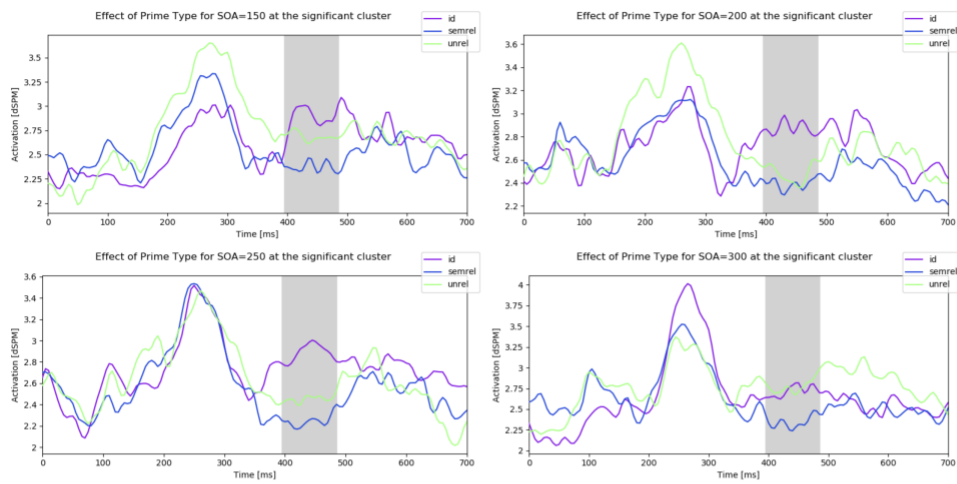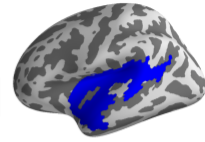

## Word Reading

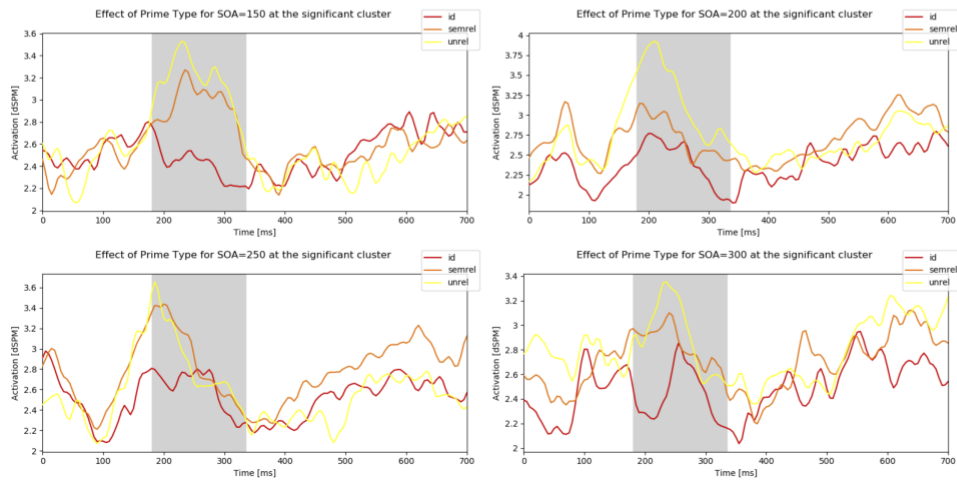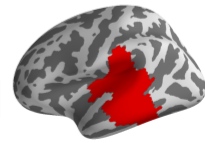

Post-hoc visual inspection of the effect of Prime Type in the significant clusters, plotted within Task and Within SOA
